# Supplementary material for: Analysis of Suicide After Cancer Diagnosis by US County-Level Income and Rural vs Urban Designation, 2000-2016
Source: PubMed Central journal article supplement (PMC8527360; doi:10.1001/jamanetworkopen.2021.29913), 2021-10-19
Supplement: jamanetwopen-e2129913-s001.pdf [file jamanetwopen-e2129913-s001.pdf]

## Supplementary Online Content

Suk R, Hong YR, Wasserman RM, et al. Analysis of suicide after cancer diagnosis by US county-level income and rural vs urban designation, 2000-2016. *JAMA Netw Open*. 2021;4(10):e2129913. doi:10.1001/jamanetworkopen.2021.29913

**eTable 1.** Suicide Among Persons With Cancer Diagnosis, Stratified by County-Level Income and Rural vs Urban Status and by Individual Sociodemographic Factors, SEER 18, 2000-2016

**eTable 2.** Standardized Morality Ratios (SMRs) by Latency Year, Stratified by County-Level Income and Rural vs Urban Status

**eTable 3.** Temporal Trends in First 1-Year Suicide Standardized Morality Ratios (SMRs), Stratified by County-Level Income and Rural vs Urban Status, SEER 18, 2000-2016

**eTable 4.** Suicide Risk Among Persons With Cancer Diagnosis, Stratified by County-Level Educational Attainment, SEER 18, 2000-2016

**eTable 5.** Suicide Risk Among Persons With Cancer Diagnosis, Stratified by County-Level Unemployment, SEER 18, 2000-2016

**eTable 6.** Suicide Risk Among Persons With Cancer Diagnosis, Cross-Stratified by County-Level Income and Rural vs Urban Status, SEER 18, 2000-2016

**eTable 7.** Suicide Risk Among Persons With Cancer Diagnosis, Stratified by County-Level Percentage of Black Residents, SEER 18, 2000-2016

**eTable 8.** Suicide Risk Among Persons With Cancer Diagnosis, Cross-Stratified by County-Level Income and Percentage of Black Residents, SEER 18, 2000-2016

**eTable 9.** Suicide Risk Among Persons With Cancer Diagnosis, Cross-Stratified by County-Level Rural vs Urban Status and Percentage of Black Residents, SEER 18, 2000-2016

This supplementary material has been provided by the authors to give readers additional information about their work.

**eTable 1.** Suicide Among Persons With Cancer Diagnosis, Stratified by County-Level Income and Rural vs Urban Status and by Individual Sociodemographic Factors, SEER 18, 2000-2016

|                                 | Observed Deaths, No. | Expected Deaths, No. | SMR (O/E)<br>(95% CI) | EAR<br>(per 10,000) | Persons with Cancer, No. | Person Years at Risk |
|---------------------------------|----------------------|----------------------|-----------------------|---------------------|--------------------------|----------------------|
| 1 <sup>st</sup> Income Quartile |                      |                      |                       |                     |                          |                      |
| Sex                             |                      |                      |                       |                     |                          |                      |
| Male                            | 401                  | 192                  | 2.09<br>(1.89-2.31)   | 3.00                | 167,184                  | 698,107              |
| Female                          | 55                   | 39                   | 1.40<br>(1.05-1.82)   | 0.24                | 144,846                  | 645,908              |
| Race/Ethnicity                  |                      |                      |                       |                     |                          |                      |
| NH White                        | 413                  | 205                  | 2.01<br>(1.82-2.21)   | 1.99                | 238,184                  | 1,042,782            |
| NH Black                        | 26                   | 13                   | 1.97<br>(1.29-2.88)   | 0.57                | 55,819                   | 225,944              |
| NH API                          | 1                    | 1                    | 1.94<br>(0.05-10.81)  | 0.75                | 1,648                    | 6,447                |
| Hispanic                        | 14                   | 11                   | 1.26<br>(0.69-2.11)   | 0.50                | 13,572                   | 57,365               |
| NH Other                        | 2                    | 1                    | 2.17<br>(0.26-7.84)   | 0.94                | 2,807                    | 11,477               |
| Age                             |                      |                      |                       |                     |                          |                      |
| <40                             | 21                   | 13                   | 1.59<br>(0.98-2.43)   | 0.72                | 17,294                   | 108,361              |
| 40-64                           | 194                  | 108                  | 1.79<br>(1.55-2.06)   | 1.27                | 136,412                  | 672,039              |
| ≥65                             | 241                  | 110                  | 2.20<br>(1.93-2.49)   | 2.33                | 158,324                  | 563,616              |
| 2 <sup>nd</sup> Income Quartile |                      |                      |                       |                     |                          |                      |
| Sex                             |                      |                      |                       |                     |                          |                      |
| Male                            | 389                  | 201                  | 1.94<br>(1.75-2.14)   | 2.65                | 163,531                  | 709,587              |
| Female                          | 69                   | 41                   | 1.69<br>(1.32-2.14)   | 0.43                | 144,972                  | 657,200              |
| Race/Ethnicity                  |                      |                      |                       |                     |                          |                      |
| NH White                        | 414                  | 214                  | 1.94<br>(1.76-2.13)   | 1.86                | 238,605                  | 1,078,012            |
| NH Black                        | 23                   | 11                   | 2.11<br>(1.34-3.17)   | 0.65                | 45,099                   | 186,445              |
| NH API                          | 2                    | 1                    | 2.05<br>(0.25-7.40)   | 0.78                | 3,380                    | 13,065               |
| Hispanic                        | 17                   | 15                   | 1.13<br>(0.66-1.81)   | 0.25                | 18,893                   | 78,627               |
| NH Other                        | 2                    | 1                    | 2.30<br>(0.28-8.30)   | 1.06                | 2,526                    | 10,638               |
| Age                             |                      |                      |                       |                     |                          |                      |
| <40                             | 14                   | 14                   | 1.00<br>(0.54-1.67)   | 0.00                | 18,027                   | 112,711              |

|                                 |       |       |                     |       |           |            |
|---------------------------------|-------|-------|---------------------|-------|-----------|------------|
| 40-64                           | 185   | 109   | 1.69<br>(1.46-1.95) | 1.14  | 131,091   | 666,650    |
| ≥65                             | 259   | 118   | 2.19<br>(1.93-2.48) | 2.40  | 159,385   | 587,426    |
| 3 <sup>rd</sup> Income Quartile |       |       |                     |       |           |            |
| Sex                             |       |       |                     |       |           |            |
| Male                            | 795   | 471   | 1.69<br>(1.57-1.81) | 2.00  | 358,837   | 1,621,410  |
| Female                          | 131   | 99    | 1.32<br>(1.10-1.56) | 0.20  | 328,755   | 1,546,760  |
| Race/Ethnicity                  |       |       |                     |       |           |            |
| NH White                        | 858   | 501   | 1.71<br>(1.60-1.83) | 1.41  | 537,403   | 2,537,662  |
| NH Black                        | 23    | 18    | 1.27<br>(0.81-1.91) | 0.16  | 74,647    | 311,385    |
| NH API                          | 9     | 4     | 2.14<br>(0.98-4.07) | 0.92  | 13,033    | 52,021     |
| Hispanic                        | 32    | 46    | 0.70<br>(0.48-0.99) | -0.55 | 58,336    | 249,437    |
| NH Other                        | 4     | 1     | 2.84<br>(0.77-7.28) | 1.47  | 4,173     | 17,665     |
| Age                             |       |       |                     |       |           |            |
| <40                             | 58    | 35    | 1.67<br>(1.27-2.16) | 0.84  | 43,387    | 275,377    |
| 40-64                           | 362   | 263   | 1.38<br>(1.24-1.53) | 0.63  | 293,687   | 1,562,138  |
| ≥65                             | 506   | 273   | 1.85<br>(1.70-2.02) | 1.75  | 350,518   | 1,330,654  |
| 4 <sup>th</sup> Income Quartile |       |       |                     |       |           |            |
| Sex                             |       |       |                     |       |           |            |
| Male                            | 3,740 | 2,832 | 1.32<br>(1.28-1.36) | 0.91  | 2,057,702 | 10,028,759 |
| Female                          | 774   | 633   | 1.22<br>(1.14-1.31) | 0.14  | 1,995,534 | 9,864,018  |
| Race/Ethnicity                  |       |       |                     |       |           |            |
| NH White                        | 3,873 | 2,868 | 1.35<br>(1.31-1.39) | 0.69  | 2,854,576 | 14,525,426 |
| NH Black                        | 152   | 106   | 1.44<br>(1.22-1.68) | 0.26  | 403,453   | 1,787,791  |
| NH API                          | 240   | 123   | 1.95<br>(1.72-2.22) | 0.78  | 331,394   | 1,505,271  |
| Hispanic                        | 228   | 364   | 0.63<br>(0.55-0.71) | -0.67 | 450,625   | 2,017,192  |
| NH Other                        | 21    | 5     | 4.52<br>(2.80-6.91) | 2.86  | 13,188    | 57,096     |
| Age                             |       |       |                     |       |           |            |
| <40                             | 251   | 236   | 1.06<br>(0.94-1.20) | 0.08  | 283,839   | 1,853,730  |
| 40-64                           | 2,003 | 1,644 | 1.22<br>(1.17-1.27) | 0.36  | 1,771,393 | 10,082,680 |
| ≥65                             | 2,260 | 1,585 | 1.43<br>(1.37-1.49) | 0.85  | 1,998,004 | 7,956,367  |
| Rural                           |       |       |                     |       |           |            |
| Sex                             |       |       |                     |       |           |            |

|                |       |       |                     |       |           |            |
|----------------|-------|-------|---------------------|-------|-----------|------------|
| Male           | 929   | 507   | 1.83<br>(1.72-1.95) | 2.42  | 394,339   | 1,742,257  |
| Female         | 149   | 105   | 1.42<br>(1.20-1.67) | 0.27  | 350,448   | 1,630,994  |
| Race/Ethnicity |       |       |                     |       |           |            |
| NH White       | 986   | 559   | 1.76<br>(1.66-1.88) | 1.51  | 610,993   | 2,818,237  |
| NH Black       | 28    | 16    | 1.77<br>(1.17-2.55) | 0.45  | 66,483    | 267,525    |
| NH API         | 32    | 11    | 2.80<br>(1.92-3.95) | 1.51  | 30,921    | 135,960    |
| Hispanic       | 26    | 24    | 1.08<br>(0.71-1.58) | 0.15  | 30,889    | 128,585    |
| NH Other       | 6     | 2     | 3.25<br>(1.19-7.07) | 1.81  | 5,501     | 22,945     |
| Age            |       |       |                     |       |           |            |
| <40            | 49    | 35    | 1.42<br>(1.05-1.88) | 0.54  | 42,103    | 269,547    |
| 40-64          | 451   | 279   | 1.62<br>(1.47-1.77) | 1.05  | 314,087   | 1,643,195  |
| ≥65            | 578   | 299   | 1.93<br>(1.78-2.10) | 1.91  | 388,597   | 1,460,510  |
| Urban          |       |       |                     |       |           |            |
| Sex            |       |       |                     |       |           |            |
| Male           | 4,396 | 3,188 | 1.38<br>(1.34-1.42) | 1.07  | 2,352,914 | 11,315,604 |
| Female         | 880   | 708   | 1.24<br>(1.16-1.33) | 0.16  | 2,263,659 | 11,082,892 |
| Race/Ethnicity |       |       |                     |       |           |            |
| NH White       | 4,572 | 3,230 | 1.42<br>(1.37-1.46) | 0.82  | 3,257,774 | 16,365,645 |
| NH Black       | 196   | 132   | 1.48<br>(1.28-1.71) | 0.28  | 512,535   | 2,244,041  |
| NH API         | 220   | 117   | 1.88<br>(1.64-2.15) | 0.71  | 318,534   | 1,440,843  |
| Hispanic       | 265   | 411   | 0.64<br>(0.57-0.73) | -0.64 | 510,537   | 2,274,036  |
| NH Other       | 23    | 6     | 3.83<br>(2.43-5.75) | 2.30  | 17,193    | 73,930     |
| Age            |       |       |                     |       |           |            |
| <40            | 295   | 263   | 1.12<br>(1.00-1.26) | 0.15  | 320,443   | 2,080,631  |
| 40-64          | 2,293 | 1,846 | 1.24<br>(1.19-1.29) | 0.39  | 2,018,496 | 11,340,311 |
| ≥65            | 2,688 | 1,787 | 1.50<br>(1.45-1.56) | 1.00  | 2,277,634 | 8,977,553  |

SEER, Surveillance, Epidemiology, and End Results;

No., number; SMR, standardized mortality ratio; O/E, observed/expected; CI, confidence interval; EAR, excess absolute risk

1<sup>st</sup> quartile, \$9,330-\$29,680 (178 counties); 2<sup>nd</sup> quartile, \$29,690-\$33,850 (116 counties); 3<sup>rd</sup> quartile, \$33,860-\$39,570 (152 counties);

4<sup>th</sup> quartile, \$39,580-\$82,930 (166 counties)

Rural, Non-metropolitan counties (Rural vs Urban Continuum codes 4-9; 366 counties); Urban, Metropolitan counties (Rural vs Urban Continuum codes 1-3; 246 counties)

NH, non-Hispanic; API, Asian/Pacific Islander

**eTable 2.** Standardized Morality Ratios (SMRs) by Latency Year, Stratified by County-Level Income and Rural vs Urban Status

| County Attributes                | Observed Deaths, No. | Expected Deaths, No. | SMR (O/E) (95% CI) | EAR (per 10,000) | Persons with Cancer, No. | Person Years at Risk |
|----------------------------------|----------------------|----------------------|--------------------|------------------|--------------------------|----------------------|
| Income quartiles                 |                      |                      |                    |                  |                          |                      |
| 1 <sup>st</sup> (lowest income)  |                      |                      |                    |                  |                          |                      |
| <1 year                          | 140                  | 39                   | 3.60 (3.03-4.25)   | 4.30             | 299,268                  | 234,984              |
| 1-5 years                        | 152                  | 95                   | 1.60 (1.36-1.88)   | 1.01             | 201,190                  | 566,079              |
| 5-10 years                       | 87                   | 40                   | 1.44 (1.15-1.77)   | 0.77             | 101,967                  | 345,535              |
| ≥10 years                        | 41                   | 22                   | 1.83 (1.31-2.48)   | 1.48             | 42,027                   | 125,336              |
| 2 <sup>nd</sup>                  |                      |                      |                    |                  |                          |                      |
| <1 year                          | 143                  | 40                   | 3.54 (2.98-4.17)   | 4.32             | 297,706                  | 237,552              |
| 1-5 years                        | 184                  | 102                  | 1.81 (1.56-2.09)   | 1.41             | 205,507                  | 586,445              |
| 5-10 years                       | 116                  | 66                   | 1.76 (1.45-2.11)   | 1.38             | 106,547                  | 363,784              |
| ≥10 years                        | 36                   | 25                   | 1.43 (1.00-1.99)   | 0.82             | 44,361                   | 132,669              |
| 3 <sup>rd</sup>                  |                      |                      |                    |                  |                          |                      |
| <1 year                          | 384                  | 98                   | 2.91 (2.58-3.26)   | 3.31             | 696,914                  | 563,520              |
| 1-5 years                        | 357                  | 251                  | 1.42 (1.28-1.58)   | 0.75             | 491,489                  | 1,419,750            |
| 5-10 years                       | 221                  | 167                  | 1.32 (1.15-1.51)   | 0.60             | 261,016                  | 897,554              |
| ≥10 years                        | 73                   | 65                   | 1.12 (0.88-1.41)   | 0.24             | 110,710                  | 334,304              |
| 4 <sup>th</sup> (highest income) |                      |                      |                    |                  |                          |                      |
| <1 year                          | 1,308                | 559                  | 2.34 (2.22-2.47)   | 2.23             | 4,067,783                | 3,361,329            |
| 1-5 years                        | 1,735                | 1,486                | 1.17 (1.11-1.22)   | 0.29             | 2,967,466                | 8,737,301            |
| 5-10 years                       | 1,065                | 1,022                | 1.04 (0.98-1.11)   | 0.08             | 1,631,719                | 5,691,190            |
| ≥10 years                        | 413                  | 411                  | 1.00 (0.91-1.11)   | 0.01             | 714,873                  | 2,176,114            |
| Rural vs Urban status            |                      |                      |                    |                  |                          |                      |
| Rural                            |                      |                      |                    |                  |                          |                      |
| <1 year                          | 337                  | 97                   | 3.48 (3.11-3.87)   | 4.43             | 676,543                  | 541,970              |

|            |       |       |                     |      |           |           |
|------------|-------|-------|---------------------|------|-----------|-----------|
| 1-5 years  | 373   | 244   | 1.53<br>(1.38-1.69) | 0.96 | 469,786   | 1,345,397 |
| 5-10 years | 232   | 160   | 1.45<br>(1.27-1.65) | 0.85 | 245,823   | 843,257   |
| ≥10 years  | 75    | 61    | 1.23<br>(0.97-1.55) | 0.46 | 103,453   | 309,249   |
| Urban      |       |       |                     |      |           |           |
| <1 year    | 1,538 | 639   | 2.41<br>(2.29-2.53) | 2.33 | 4,685,117 | 3,855,409 |
| 1-5 years  | 2,055 | 1,689 | 1.22<br>(1.16-1.27) | 0.37 | 3,395,862 | 9,964,170 |
| 5-10 years | 1,257 | 1,155 | 1.09<br>(1.03-1.15) | 0.16 | 1,855,425 | 6,454,802 |
| ≥10 years  | 488   | 463   | 1.05<br>(0.96-1.15) | 0.10 | 808,518   | 2,459,173 |

SEER, Surveillance, Epidemiology, and End Results;

No., number; SMR, standardized mortality ratio; O/E, observed/expected; CI, confidence interval; EAR, excess absolute risk

1<sup>st</sup> quartile, \$9,330-\$29,680 (178 counties); 2<sup>nd</sup> quartile, \$29,690-\$33,850 (116 counties); 3<sup>rd</sup> quartile, \$33,860-\$39,570 (152 counties);

4<sup>th</sup> quartile, \$39,580-\$82,930 (166 counties)

Rural, Non-metropolitan counties (Rural vs Urban Continuum codes 4-9; 366 counties); Urban, Metropolitan counties (Rural vs Urban Continuum codes 1-3; 246 counties)

**eTable 3.** Temporal Trends in First 1-Year Suicide Standardized Morality Ratios (SMRs), Stratified by County-Level Income and Rural vs Urban Status, SEER 18, 2000-2016

|                                  | Trends    |                          |                        |
|----------------------------------|-----------|--------------------------|------------------------|
|                                  | Segments  |                          | Overall (2000-2015)    |
|                                  | Year      | APC (95% CI)             | AAPC (95% CI)          |
| <b>Income quartiles</b>          |           |                          |                        |
| 1 <sup>st</sup> (lowest income)  | 2000-2010 | -5.90 (-14.92 to -0.31)  | -2.46 (-11.06 to 6.98) |
|                                  | 2010-2015 | 4.80 (-19.97 to 37.24)   |                        |
| 2 <sup>nd</sup>                  | 2000-2015 | 0.27 (-3.99 to 4.71)     | 0.27 (-3.99 to 4.71)   |
| 3 <sup>rd</sup>                  | 2000-2005 | -4.64 (-9.25 to -0.03)   | -0.50 (-8.03 to 7.65)  |
|                                  | 2005-2015 | 1.64 (-5.78 to 9.64)     |                        |
| 4 <sup>th</sup> (highest income) | 2000-2005 | -8.31 (-15.75 to -0.21)  | -1.54 (-4.52 to 1.54)  |
|                                  | 2005-2015 | 2.03 (-0.97 to 5.13)     |                        |
| <b>Rural vs Urban status</b>     |           |                          |                        |
| Rural                            | 2000-2004 | -15.48 (-28.45 to -0.17) | -3.11 (-7.53 to 1.53)  |
|                                  | 2004-2015 | 1.83 (-1.98 to 5.79)     |                        |
| Urban                            | 2000-2015 | -0.59 (-2.20 to 1.05)    | -0.59 (-2.20 to 1.05)  |

SEER, Surveillance, Epidemiology, and End Results;

SMR, standardized mortality ratio; APC, annual percentage change; AAPC, average annual percentage change; CI, confidence interval;

1<sup>st</sup> quartile, \$9,330-\$29,680 (178 counties); 2<sup>nd</sup> quartile, \$29,690-\$33,850 (116 counties); 3<sup>rd</sup> quartile, \$33,860-\$39,570 (152 counties); 4<sup>th</sup> quartile, \$39,580-\$82,930 (166 counties)

Rural, Non-metropolitan counties (Rural vs Urban Continuum codes 4-9; 366 counties); Urban, Metropolitan counties (Rural vs Urban Continuum codes 1-3; 246 counties)

**eTable 4.** Suicide Risk Among Persons With Cancer Diagnosis, Stratified by County-Level Educational Attainment, SEER 18, 2000-2016

| County Attributes                                    | Observed Deaths, No. | Expected Deaths, No. | SMR (O/E) (95% CI) | EAR (per 10,000) | Persons with Cancer, No. | Person Years at Risk |
|------------------------------------------------------|----------------------|----------------------|--------------------|------------------|--------------------------|----------------------|
| % of less than high-school quartiles                 |                      |                      |                    |                  |                          |                      |
| 1 <sup>st</sup> (lowest % of less than high-school)  | 1,942                | 1,542                | 1.26 (1.20-1.32)   | 0.47             | 1,673,993                | 8,533,932            |
| 2 <sup>nd</sup>                                      | 2,008                | 1,430                | 1.40 (1.34-1.47)   | 0.71             | 1,681,292                | 8,174,163            |
| 3 <sup>rd</sup>                                      | 1,050                | 343                  | 1.63 (1.54-1.74)   | 1.06             | 840,799                  | 3,833,998            |
| 4 <sup>th</sup> (highest % of less than high-school) | 1,355                | 894                  | 1.52 (1.44-1.60)   | 0.88             | 1,165,587                | 5,231,353            |

SEER, Surveillance, Epidemiology, and End Results;

No., number; SMR, standardized mortality ratio; O/E, observed/expected; CI, confidence interval; EAR, excess absolute risk

1<sup>st</sup> quartile, 3.04%-15.91% (144 counties); 2<sup>nd</sup> quartile, 15.92%-20.76% (114 counties); 3<sup>rd</sup> quartile, 20.77%-28.67% (120 counties); 4<sup>th</sup> quartile, 28.68%-65.30% (235 counties)



**eTable 5.** Suicide Risk Among Persons With Cancer Diagnosis, Stratified by County-Level Unemployment, SEER 18, 2000-2016

| County Attributes                      | Observed Deaths, No. | Expected Deaths, No. | SMR (O/E) (95% CI) | EAR (per 10,000) | Persons with Cancer, No. | Person Years at Risk |
|----------------------------------------|----------------------|----------------------|--------------------|------------------|--------------------------|----------------------|
| Unemployment rate quartiles            |                      |                      |                    |                  |                          |                      |
| 1 <sup>st</sup> (lowest unemployment)  | 872                  | 711                  | 1.23 (1.15-1.31)   | 0.41             | 779,188                  | 3,906,391            |
| 2 <sup>nd</sup>                        | 1,629                | 1,273                | 1.28 (1.22-1.34)   | 0.51             | 1,401,798                | 6,996,138            |
| 3 <sup>rd</sup>                        | 1,686                | 1,104                | 1.53 (1.45-1.60)   | 0.91             | 1,334,647                | 6,412,408            |
| 4 <sup>th</sup> (highest unemployment) | 2,168                | 1,421                | 1.53 (1.46-1.59)   | 0.88             | 1,846,038                | 8,458,509            |

SEER, Surveillance, Epidemiology, and End Results;

No., number; SMR, standardized mortality ratio; O/E, observed/expected; CI, confidence interval; EAR, excess absolute risk

1<sup>st</sup> quartile, 0.00%-3.97% (132 counties); 2<sup>nd</sup> quartile, 3.98%-5.35% (135 counties); 3<sup>rd</sup> quartile, 5.36%-6.95% (147 counties); 4<sup>th</sup> quartile, 6.96%-41.67% (199 counties)

**eTable 6.** Suicide Risk Among Persons With Cancer Diagnosis, Cross-Stratified by County-Level Income and Rural vs Urban Status, SEER 18, 2000-2016

| County Attributes                       | Observed Deaths, No. | Expected Deaths, No. | SMR (O/E)<br>(95% CI) | EAR<br>(per 10,000) | Persons with Cancer, No. | Person Years at Risk |
|-----------------------------------------|----------------------|----------------------|-----------------------|---------------------|--------------------------|----------------------|
| Income quartiles and rural/urban status |                      |                      |                       |                     |                          |                      |
| 1 <sup>st</sup> (lowest income)         |                      |                      |                       |                     |                          |                      |
| Rural                                   | 365                  | 190                  | 1.92<br>(1.73-2.13)   | 1.64                | 252,842                  | 1,068,164            |
| Urban                                   | 55                   | 27                   | 2.02<br>(1.52-2.63)   | 1.36                | 46,426                   | 203,770              |
| 2 <sup>nd</sup>                         |                      |                      |                       |                     |                          |                      |
| Rural                                   | 240                  | 120                  | 2.01<br>(1.76-2.28)   | 1.87                | 144,630                  | 642,786              |
| Urban                                   | 239                  | 113                  | 2.11<br>(1.85-2.39)   | 1.85                | 153,076                  | 677,664              |
| 3 <sup>rd</sup>                         |                      |                      |                       |                     |                          |                      |
| Rural                                   | 249                  | 150                  | 1.66<br>(1.46-1.88)   | 1.29                | 163,567                  | 766,324              |
| Urban                                   | 686                  | 431                  | 1.59<br>(1.47-1.72)   | 1.04                | 533,347                  | 2,448,805            |
| 4 <sup>th</sup> (highest income)        |                      |                      |                       |                     |                          |                      |
| Rural                                   | 163                  | 103                  | 1.58<br>(1.35-1.84)   | 1.06                | 155,504                  | 562,600              |
| Urban                                   | 4,358                | 3,375                | 1.29<br>(1.25-1.33)   | 0.51                | 3,952,268                | 19,403,316           |

SEER, Surveillance, Epidemiology, and End Results;

No., number; SMR, standardized mortality ratio; O/E, observed/expected; CI, confidence interval; EAR, excess absolute risk

1<sup>st</sup> quartile, \$9,330-\$29,680; 2<sup>nd</sup> quartile, \$29,690-\$33,850; 3<sup>rd</sup> quartile, \$33,860-\$39,570; 4<sup>th</sup> quartile, \$39,580-\$82,930

Rural, Non-metropolitan counties (Rural vs Urban Continuum codes 4-9); Urban, Metropolitan counties (Rural vs Urban Continuum codes 1-3)

1<sup>st</sup> income quartile & rural: 163 counties; 1<sup>st</sup> income quartile & urban: 15 counties; 2<sup>nd</sup> income quartile & rural: 83 counties; 2<sup>nd</sup> income quartile & urban: 33 counties; 3<sup>rd</sup> income quartile & rural: 89 counties; 3<sup>rd</sup> income quartile & urban: 63 counties; 4<sup>th</sup> income quartile & rural: 31 counties; 4<sup>th</sup> income quartile & urban: 135 counties

**eTable 7.** Suicide Risk Among Persons With Cancer Diagnosis, Stratified by County-Level Percentage of Black Residents, SEER 18, 2000-2016

| County Attributes     | Observed Deaths, No. | Expected Deaths, No. | SMR (O/E) (95% CI)  | EAR (per 10,000) | Persons with Cancer, No. | Person Years at Risk |
|-----------------------|----------------------|----------------------|---------------------|------------------|--------------------------|----------------------|
| % of Black population |                      |                      |                     |                  |                          |                      |
| 0%~<12.5%             | 4,865                | 3,382                | 1.44<br>(1.40-1.48) | 0.79             | 3,864,341                | 18,754,202           |
| 12.5%~<30.0%          | 884                  | 738                  | 1.20<br>(1.12-1.28) | 0.34             | 907,600                  | 4,322,317            |
| 30.0%~<50.0%          | 490                  | 325                  | 1.51<br>(1.38-1.65) | 0.76             | 476,991                  | 2,181,654            |
| ≥50.0%                | 116                  | 64                   | 1.82<br>(1.51-2.19) | 1.02             | 112,739                  | 515,273              |

SEER, Surveillance, Epidemiology, and End Results;

No., number; SMR, standardized mortality ratio; O/E, observed/expected; CI, confidence interval; EAR, excess absolute risk

0-12.5% Black population: 413 counties; 12.5-30% Black population: 94 counties; 30-50% Black population: 79 counties; >50% Black population: 26 counties

**eTable 8.** Suicide Risk Among Persons With Cancer Diagnosis, Cross-Stratified by County-Level Income and Percentage of Black Residents, SEER 18, 2000-2016

| County Attributes                          | Observed Deaths, No. | Expected Deaths, No. | SMR (O/E) (95% CI) | EAR (per 10,000) | Persons with Cancer, No. | Person Years at Risk |
|--------------------------------------------|----------------------|----------------------|--------------------|------------------|--------------------------|----------------------|
| Income quartiles and % of Black population |                      |                      |                    |                  |                          |                      |
| 1 <sup>st</sup> (lowest income)            |                      |                      |                    |                  |                          |                      |
| 0%~<12.5% Black pop.                       | 220                  | 113                  | 1.95 (1.70-2.22)   | 1.80             | 139,446                  | 592,898              |
| 12.5%~<30.0%                               | 79                   | 43                   | 1.86 (1.47-2.31)   | 1.46             | 58,779                   | 250,177              |
| 30.0%~<50.0%                               | 70                   | 41                   | 1.73 (1.35-2.18)   | 1.14             | 61,563                   | 258,495              |
| ≥50.0%                                     | 51                   | 21                   | 2.47 (1.84-3.25)   | 1.78             | 39,480                   | 170,363              |
| 2 <sup>nd</sup>                            |                      |                      |                    |                  |                          |                      |
| 0%~<12.5% Black pop.                       | 297                  | 144                  | 2.07 (1.84-2.32)   | 2.07             | 166,346                  | 741,741              |
| 12.5%~<30.0%                               | 53                   | 22                   | 2.42 (1.81-3.16)   | 2.45             | 29,624                   | 126,774              |
| 30.0%~<50.0%                               | 103                  | 55                   | 1.86 (1.52-2.26)   | 1.34             | 80,164                   | 356,203              |
| ≥50.0%                                     | 26                   | 12                   | 2.16 (1.41-3.16)   | 1.46             | 21,572                   | 95,731               |
| 3 <sup>rd</sup>                            |                      |                      |                    |                  |                          |                      |
| 0%~<12.5% Black pop.                       | 636                  | 383                  | 1.66 (1.53-1.79)   | 1.26             | 431,450                  | 2,010,741            |
| 12.5%~<30.0%                               | 190                  | 136                  | 1.40 (1.20-1.61)   | 0.68             | 173,755                  | 790,704              |
| 30.0%~<50.0%                               | 109                  | 62                   | 1.77 (1.45-2.13)   | 1.14             | 91,709                   | 413,684              |
| ≥50.0%                                     | 0                    | 0                    | 0                  | 0                | 0                        | 0                    |
| 4 <sup>th</sup> (highest income)           |                      |                      |                    |                  |                          |                      |
| 0%~<12.5% Black pop.                       | 3,712                | 2,743                | 1.35 (1.31-1.40)   | 0.63             | 3,127,099                | 15,408,822           |
| 12.5%~<30.0%                               | 562                  | 537                  | 1.05 (0.96-1.14)   | 0.08             | 645,442                  | 3,154,662            |
| 30.0%~<50.0%                               | 208                  | 167                  | 1.24 (1.08-1.42)   | 0.35             | 243,555                  | 1,153,271            |
| ≥50.0%                                     | 39                   | 31                   | 1.26 (0.90-1.72)   | 0.32             | 51,687                   | 249,179              |

SEER, Surveillance, Epidemiology, and End Results;

No., number; SMR, standardized mortality ratio; O/E, observed/expected; CI, confidence interval; EAR, excess absolute risk; pop., population

1<sup>st</sup> quartile, \$9,330-\$29,680; 2<sup>nd</sup> quartile, \$29,690-\$33,850; 3<sup>rd</sup> quartile, \$33,860-\$39,570; 4<sup>th</sup> quartile, \$39,580-\$82,930

1<sup>st</sup> income quartile & 0-12.5% Black population: 90 counties; 1<sup>st</sup> income quartile & 12.5-30% Black population: 29 counties; 1<sup>st</sup> income quartile & 30-50% Black population: 40 counties; 1<sup>st</sup> income quartile & >50% Black population: 19 counties; 2<sup>nd</sup> income quartile & 0-12.5% Black population: 75 counties; 2<sup>nd</sup> income quartile & 12.5-30% Black population: 15 counties; 2<sup>nd</sup> income quartile & 30-50% Black population: 22 counties; 2<sup>nd</sup> income quartile & >50% Black population: 4 counties; 3<sup>rd</sup> income quartile & 0-12.5% Black population: 123 counties; 3<sup>rd</sup> income quartile & 12.5-30% Black population: 15 counties; 3<sup>rd</sup> income quartile & 30-50% Black population: 14 counties; 3<sup>rd</sup> income quartile & >50% Black population: 0; 4<sup>th</sup> income quartile & 0-12.5% Black population: 126 counties; 4<sup>th</sup> income

quartile & 12.5-30% Black population: 35 counties; 4<sup>th</sup> income quartile & 30-50% Black population: 3 counties; 4<sup>th</sup> income quartile & >50% Black population: 3 counties

**eTable 9.** Suicide Risk Among Persons With Cancer Diagnosis, Cross-Stratified by County-Level Rural vs Urban Status and Percentage of Black Residents, SEER 18, 2000-2016

| County Attributes                            | Observed Deaths, No. | Expected Deaths, No. | SMR (O/E) (95% CI) | EAR (per 10,000) | Persons with Cancer, No. | Person Years at Risk |
|----------------------------------------------|----------------------|----------------------|--------------------|------------------|--------------------------|----------------------|
| Rural/urban status and % of Black population |                      |                      |                    |                  |                          |                      |
| Rural                                        |                      |                      |                    |                  |                          |                      |
| 0%~<12.5% Black pop.                         | 793                  | 438                  | 1.81 (1.69-1.94)   | 1.56             | 496,648                  | 2,275,940            |
| 12.5%~<30.0%                                 | 106                  | 58                   | 1.82 (1.49-2.20)   | 1.42             | 79,498                   | 336,694              |
| 30.0%~<50.0%                                 | 99                   | 60                   | 1.64 (1.33-2.00)   | 1.00             | 90,392                   | 385,689              |
| ≥50.0%                                       | 19                   | 5                    | 3.51 (2.12-5.49)   | 3.27             | 10,005                   | 41,551               |
| Urban                                        |                      |                      |                    |                  |                          |                      |
| 0%~<12.5% Black pop.                         | 4,072                | 2,944                | 1.38 (1.34-1.43)   | 0.68             | 3,367,682                | 16,478,244           |
| 12.5%~<30.0%                                 | 778                  | 679                  | 1.14 (1.07-1.23)   | 0.25             | 828,102                  | 3,985,623            |
| 30.0%~<50.0%                                 | 391                  | 265                  | 1.48 (1.33-1.63)   | 0.70             | 386,599                  | 1,795,965            |
| ≥50.0%                                       | 97                   | 58                   | 1.67 (1.35-2.03)   | 0.82             | 102,734                  | 473,722              |

SEER, Surveillance, Epidemiology, and End Results;

No., number; SMR, standardized mortality ratio; O/E, observed/expected; CI, confidence interval; EAR, excess absolute risk; pop., population

Rural, Non-metropolitan counties (Rural vs Urban Continuum codes 4-9); Urban, Metropolitan counties (Rural vs Urban Continuum codes 1-3)

Rural & 0-12.5% Black population: 258 counties; Rural & 12.5-30% Black population: 41 counties; Rural & 30-50% Black population: 52 counties; Rural & >50% Black population: 15 counties; Urban & 0-12.5% Black population: 155 counties; Urban & 12.5-30% Black population: 53 counties; Urban & 30-50% Black population: 27 counties; Urban & >50% Black population: 11 counties
